# Supplementary material for: Waste-to-Resource Strategy to Fabricate Functionalized MOFs Composite Material Based on Durian Shell Biomass Carbon Fiber and Fe3O4 for Highly Efficient and Recyclable Dye Adsorption
Source: MDPI journal article supplement (doi:10.3390/ijms23115900), 2022-05-24
Supplement: s1 [file s1]

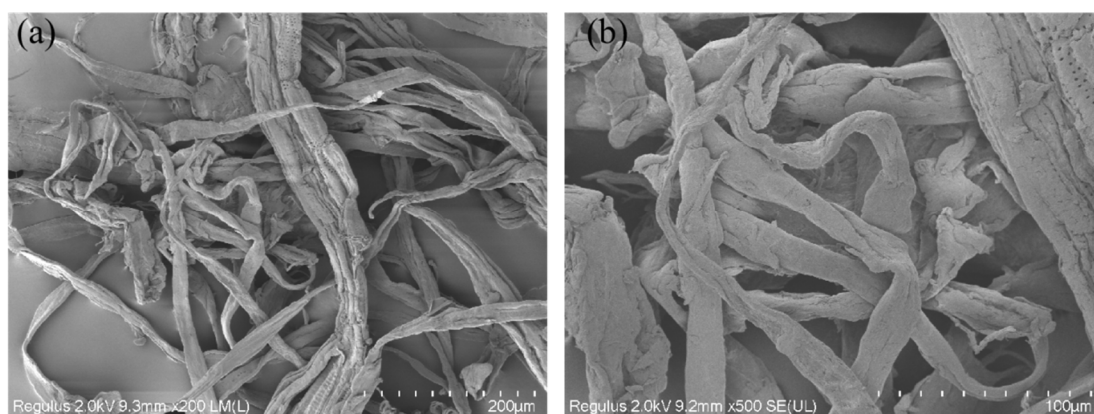

**Figure S1.** SEM images of durian shell fiber

**Table S1.** Previous studies on the adsorption of MB with different adsorbents.

| Adsorbents                                                      | Temperature(K) | $Q_e$ (mg/g) | Ref.      |
|-----------------------------------------------------------------|----------------|--------------|-----------|
| Chitosan-crosslinked bismuth ferrite/biochar                    | 298            | 18.942       | [52]      |
| BC-HAP                                                          | 313            | 21.1         | [53]      |
| Acrylic acid-acrylonitrile-N-isopropylacrylamide polymeric gels | 298            | 2.79         | [54]      |
| Biochar                                                         | 298            | 7.2          | [55]      |
| PG                                                              | 298            | 0.2          | [56]      |
| Eichhornia crassipes biomass                                    | 298            | 35.4         | [57]      |
| DFM-10                                                          | 298-318        | 53.31        | This work |

## Reference:

52. Cai, X.; Li, J.; Liu, Y.; Hu, X.; Tan, X.; Liu, S.; Wang, H.; Gu, Y.; Luo, L. Design and Preparation of Chitosan-Crosslinked Bismuth Ferrite/Biochar Coupled Magnetic Material for Methylene Blue Removal. *Int. J. Environ. Res. Public Health*. **2020**, *17*, 6. <https://doi.org/10.3390/ijerph17010006>.
53. Li, Y., Zhang, Y., Zhang, Y., Wang, G., Li, S., Han, R., Wei, W., Reed biochar supported hydroxyapatite nanocomposite: Characterization and reactivity for methylene blue removal from aqueous media. *J. Mol. Liq.* **2018**, *263*, 53–63. <https://doi.org/10.1016/j.molliq.2018.04.132>.
54. Aslam Malana, M., Parveen, S., Beenish Qureshi, R., Adsorptive removal of organic dyes from aqueous solutions using acrylic acid-acrylonitrile-N-isopropylacrylamide polymeric gels as adsorbents: linear and non linear isotherms. *DESALINATION Water Treat.* **2016**, *57*, 22543–22550. <https://doi.org/10.1080/19443994.2015.1132393>.
55. Jh, A., Hg, B., Nm, A., Hj, A., Removal of methylene blue from aqueous solutions by biochar prepared from the pyrolysis of mixed municipal discarded material. *Sci. Total Environ.* **2020**, *714*, 136832. <https://doi.org/10.1016/j.scitotenv.2020.136832>.
56. Gao, Y., Sun, D., Han, C., Huang, J., Comprehensive Utilization of Phosphogypsum: Adsorption of Methylene Blue and its Application in Bricks. *Surf. Rev. Lett.* **2021**, *28*, 2150075. <https://doi.org/10.1142/S0218625X2150075X>.
57. Wanyonyi, W. C. , Onyari, J. M. , Shiundu, P. M., Adsorption of methylene blue dye from aqueous solutions using eichhornia crassipes. *Bulletin of Environmental Contamination & Toxicology*. **2013**, *91*, 362-366. <https://doi.org/10.1007/s00128-013-1053-0>.
